# Supplementary material for: Arterial spin labeling versus BOLD in direct challenge and drug-task interaction pharmacological fMRI
Source: PeerJ journal article supplement (doi:10.7717/peerj.687), 2014-12-11
Supplement: SupplementalFigure1.pdf [file SupplementalFigure1.pdf]

## 2 back increases 60 mg only 5p7mm

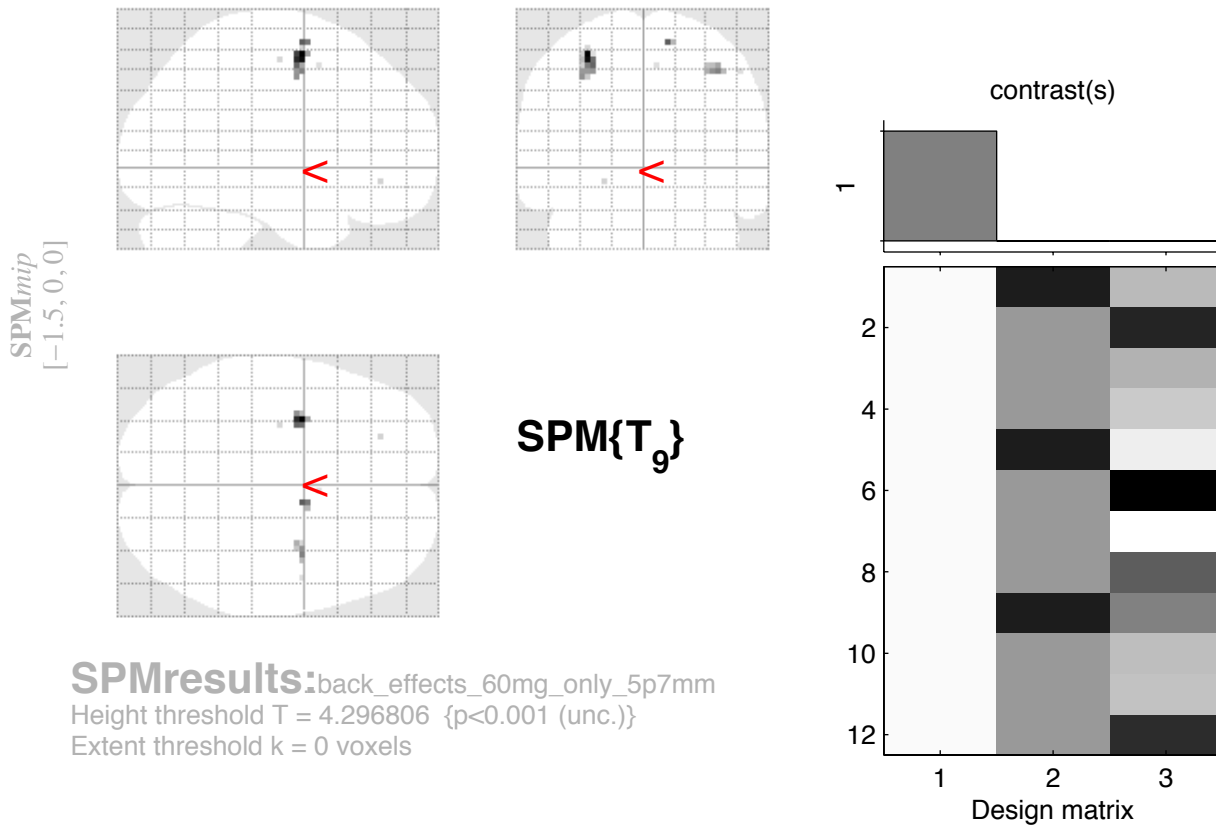

### Statistics: $p$ -values adjusted for search volume

| set-level |     | cluster-level  |                |       | peak-level   |                |                |      |                | mm mm mm     |     |     |    |
|-----------|-----|----------------|----------------|-------|--------------|----------------|----------------|------|----------------|--------------|-----|-----|----|
| $p$       | $c$ | $p_{FWE-corr}$ | $q_{FDR-corr}$ | $k_E$ | $p_{uncorr}$ | $p_{FWE-corr}$ | $q_{FDR-corr}$ | $T$  | $(Z_{\equiv})$ | $p_{uncorr}$ |     |     |    |
| 1.000     | 7   | 0.090          | 0.030          | 22    | 0.004        | 0.998          | 0.968          | 5.88 | 3.68           | 0.000        | -32 | -3  | 57 |
|           |     |                |                |       |              | 1.000          | 0.968          | 4.84 | 3.32           | 0.000        | -34 | -6  | 45 |
|           |     | 0.994          | 0.500          | 3     | 0.236        | 1.000          | 0.968          | 5.20 | 3.45           | 0.000        | 10  | -3  | 63 |
|           |     | 0.664          | 0.174          | 9     | 0.050        | 1.000          | 0.968          | 4.97 | 3.37           | 0.000        | 38  | -3  | 48 |
|           |     | 1.000          | 0.500          | 1     | 0.500        | 1.000          | 0.968          | 4.41 | 3.14           | 0.001        | -22 | 39  | -9 |
|           |     | 1.000          | 0.500          | 1     | 0.500        | 1.000          | 0.968          | 4.40 | 3.13           | 0.001        | -28 | -15 | 54 |
|           |     | 1.000          | 0.500          | 1     | 0.500        | 1.000          | 0.968          | 4.35 | 3.11           | 0.001        | 4   | 6   | 51 |
|           |     | 1.000          | 0.500          | 1     | 0.500        | 1.000          | 0.968          | 4.34 | 3.11           | 0.001        | 50  | -3  | 48 |

table shows 3 local maxima more than 8.0mm apart

Height threshold:  $T = 4.30$ ,  $p = 0.001$  (1.000)

Extent threshold:  $k = 0$  voxels

Expected voxels per cluster,  $\langle k \rangle = 2.302$

Expected number of clusters,  $\langle c \rangle = 21.92$

FWEp: 10.666, FDRp: Inf, FWEc: Inf, FDRc: 22

Degrees of freedom = [1.0, 9.0]

FWHM = 9.8 11.1 12.0 mm mm mm; 3.3 3.7 4.0 {voxels}

Volume: 1294110 = 47930 voxels = 900.0 resels

Voxel size: 3.0 3.0 3.0 mm mm mm; (resel = 47.85 voxels)

## 2 back decreases 60 mg only 5p7mm

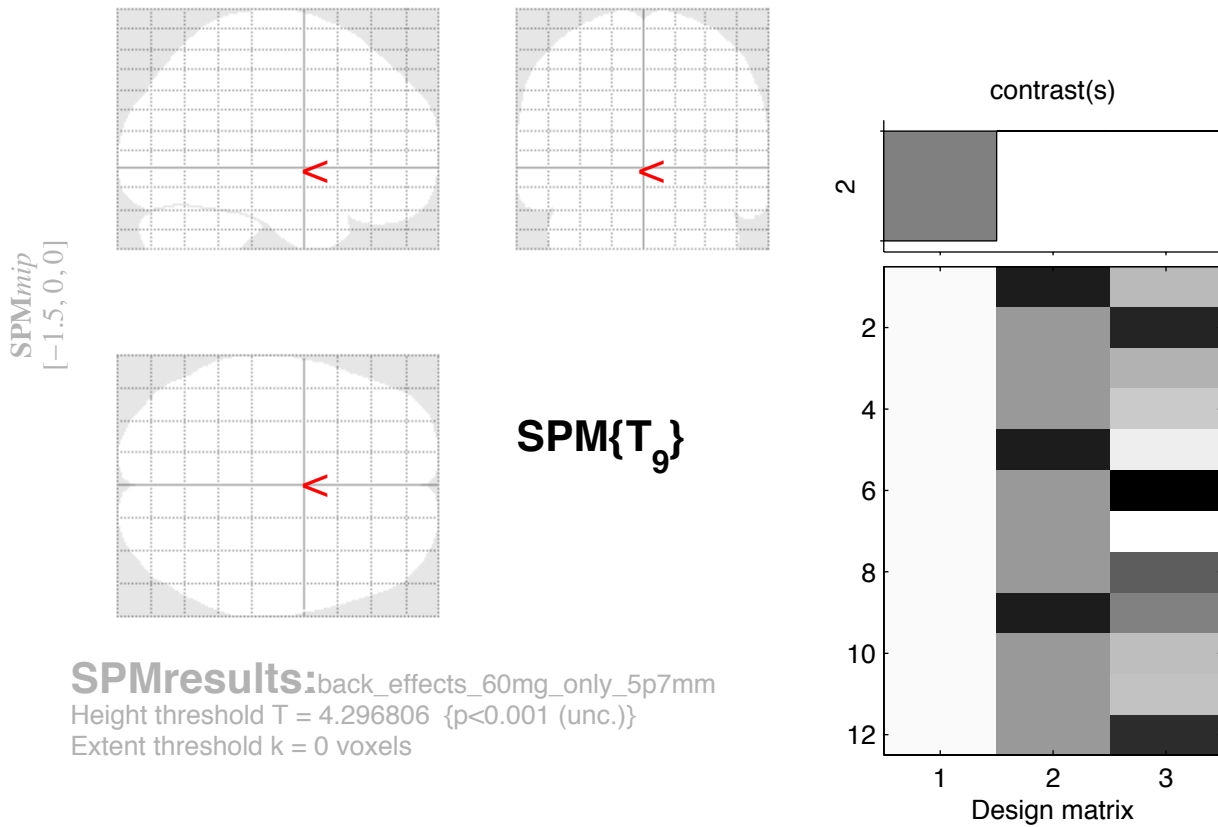

### Statistics: $p$ -values adjusted for search volume

| set-level |     | cluster-level         |                       |       | peak-level          |                       |                       |     |                  | mm                  | mm | mm |  |
|-----------|-----|-----------------------|-----------------------|-------|---------------------|-----------------------|-----------------------|-----|------------------|---------------------|----|----|--|
| $p$       | $c$ | $p_{\text{FWE-corr}}$ | $q_{\text{FDR-corr}}$ | $k_E$ | $p_{\text{uncorr}}$ | $p_{\text{FWE-corr}}$ | $q_{\text{FDR-corr}}$ | $T$ | $(Z_{\text{c}})$ | $p_{\text{uncorr}}$ |    |    |  |

*no suprathreshold clusters*

table shows 3 local maxima more than 8.0mm apart

|                                                          |                                                          |
|----------------------------------------------------------|----------------------------------------------------------|
| Height threshold: $T = 4.30$ , $p = 0.001$ (1.000)       | Degrees of freedom = [1.0, 9.0]                          |
| Extent threshold: $k = 0$ voxels                         | FWHM = 9.8 11.1 12.0 mm mm mm; 3.3 3.7 4.0 {voxels}      |
| Expected voxels per cluster, $\langle k \rangle = 2.302$ | Volume: 1294110 = 47930 voxels = 900.0 resels            |
| Expected number of clusters, $\langle c \rangle = 21.92$ | Voxel size: 3.0 3.0 3.0 mm mm mm; (resel = 47.85 voxels) |
| FWEp: 10.666, FDRp: Inf, FWEc: Inf, FDRc: Inf            |                                                          |
