# Supplementary material for: Arterial spin labeling versus BOLD in direct challenge and drug-task interaction pharmacological fMRI
Source: PeerJ journal article supplement (doi:10.7717/peerj.687), 2014-12-11
Supplement: SupplementalFigure3.pdf [file SupplementalFigure3.pdf]

# SYN x 2back increases, 60 mg only, 5p7mm

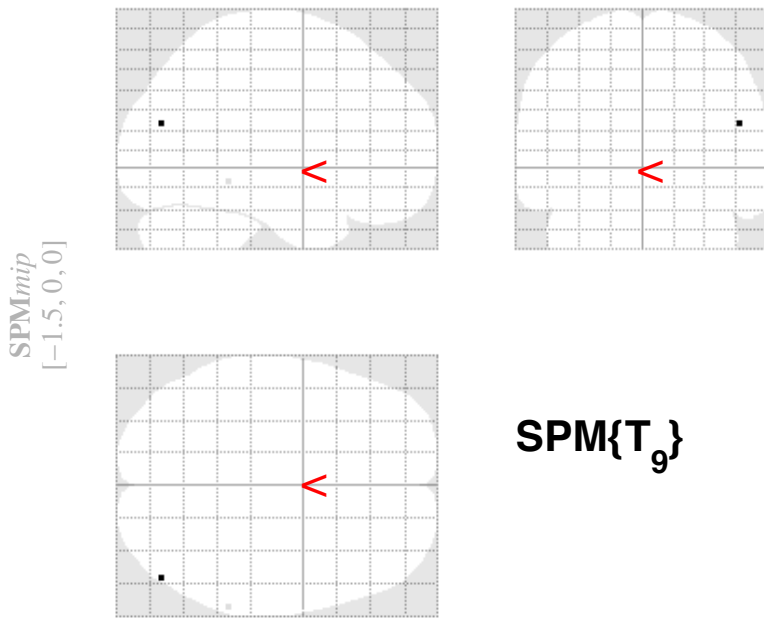

**SPMresults:** SYNx2back\_60mg\_only\_5p7mm  
 Height threshold  $T = 4.296806$  { $p < 0.001$  (unc.)}  
 Extent threshold  $k = 0$  voxels

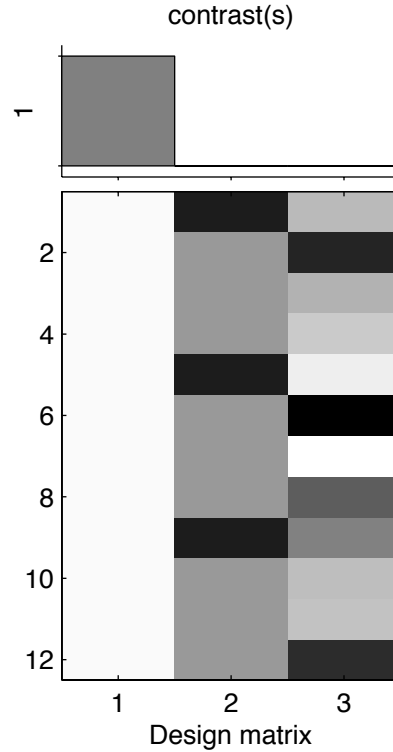

## Statistics: $p$ -values adjusted for search volume

| set-level |     | cluster-level         |                       |       | peak-level          |                       |                       |      |                    | mm mm mm            |    |     |    |
|-----------|-----|-----------------------|-----------------------|-------|---------------------|-----------------------|-----------------------|------|--------------------|---------------------|----|-----|----|
| $p$       | $c$ | $p_{\text{FWE-corr}}$ | $q_{\text{FDR-corr}}$ | $k_E$ | $p_{\text{uncorr}}$ | $p_{\text{FWE-corr}}$ | $q_{\text{FDR-corr}}$ | $T$  | $(Z_{\text{max}})$ | $p_{\text{uncorr}}$ |    |     |    |
| 1.000     | 2   | 1.000                 | 0.449                 | 1     | 0.449               | 1.000                 | 0.871                 | 4.93 | 3.35               | 0.000               | 50 | -78 | 21 |
|           |     | 1.000                 | 0.449                 | 1     | 0.449               | 1.000                 | 0.871                 | 4.47 | 3.16               | 0.001               | 64 | -42 | -9 |

table shows 3 local maxima more than 8.0mm apart

Height threshold:  $T = 4.30$ ,  $p = 0.001$  (1.000)

Extent threshold:  $k = 0$  voxels

Expected voxels per cluster,  $\langle k \rangle = 1.852$

Expected number of clusters,  $\langle c \rangle = 26.94$

FWEp: 10.666, FDRp: Inf, FWEc: Inf, FDRc: Inf

Degrees of freedom = [1.0, 9.0]

FWHM = 9.3 10.4 10.8 mm mm mm; 3.1 3.5 3.6 {voxels}

Volume: 1294110 = 47930 voxels = 1118.6 resels

Voxel size: 3.0 3.0 3.0 mm mm mm; (resel = 38.50 voxels)

# SYN x 2 back decreases, 60 mg only, 5p7mm

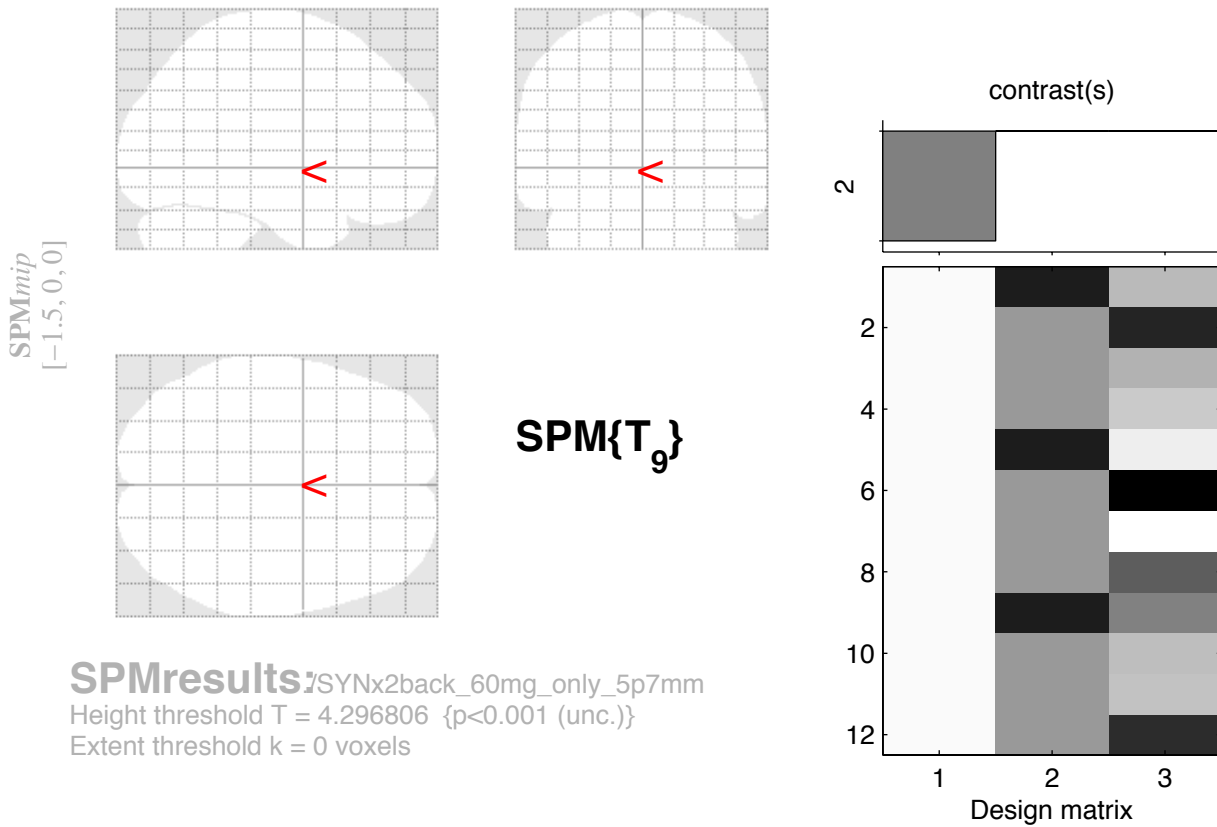

## Statistics: $p$ -values adjusted for search volume

| set-level |     | cluster-level  |                |       | peak-level   |                |                |     |                | mm           | mm | mm |  |
|-----------|-----|----------------|----------------|-------|--------------|----------------|----------------|-----|----------------|--------------|----|----|--|
| $p$       | $c$ | $p_{FWE-corr}$ | $q_{FDR-corr}$ | $k_E$ | $p_{uncorr}$ | $p_{FWE-corr}$ | $q_{FDR-corr}$ | $T$ | $(Z_{\alpha})$ | $p_{uncorr}$ |    |    |  |

*no suprathreshold clusters*

table shows 3 local maxima more than 8.0mm apart

|                                                          |                                                          |
|----------------------------------------------------------|----------------------------------------------------------|
| Height threshold: $T = 4.30$ , $p = 0.001$ (1.000)       | Degrees of freedom = [1.0, 9.0]                          |
| Extent threshold: $k = 0$ voxels                         | FWHM = 9.3 10.4 10.8 mm mm mm; 3.1 3.5 3.6 {voxels}      |
| Expected voxels per cluster, $\langle k \rangle = 1.852$ | Volume: 1294110 = 47930 voxels = 1118.6 resels           |
| Expected number of clusters, $\langle c \rangle = 26.94$ | Voxel size: 3.0 3.0 3.0 mm mm mm; (resel = 38.50 voxels) |
| FWEp: 10.666, FDRp: Inf, FWEc: Inf, FDRc: Inf            |                                                          |
