# Supplementary material for: Arterial spin labeling versus BOLD in direct challenge and drug-task interaction pharmacological fMRI
Source: PeerJ journal article supplement (doi:10.7717/peerj.687), 2014-12-11
Supplement: SupplementalFigure5.pdf [file SupplementalFigure5.pdf]

# SYN increases fixand2back, 12 subs, 5p7mm

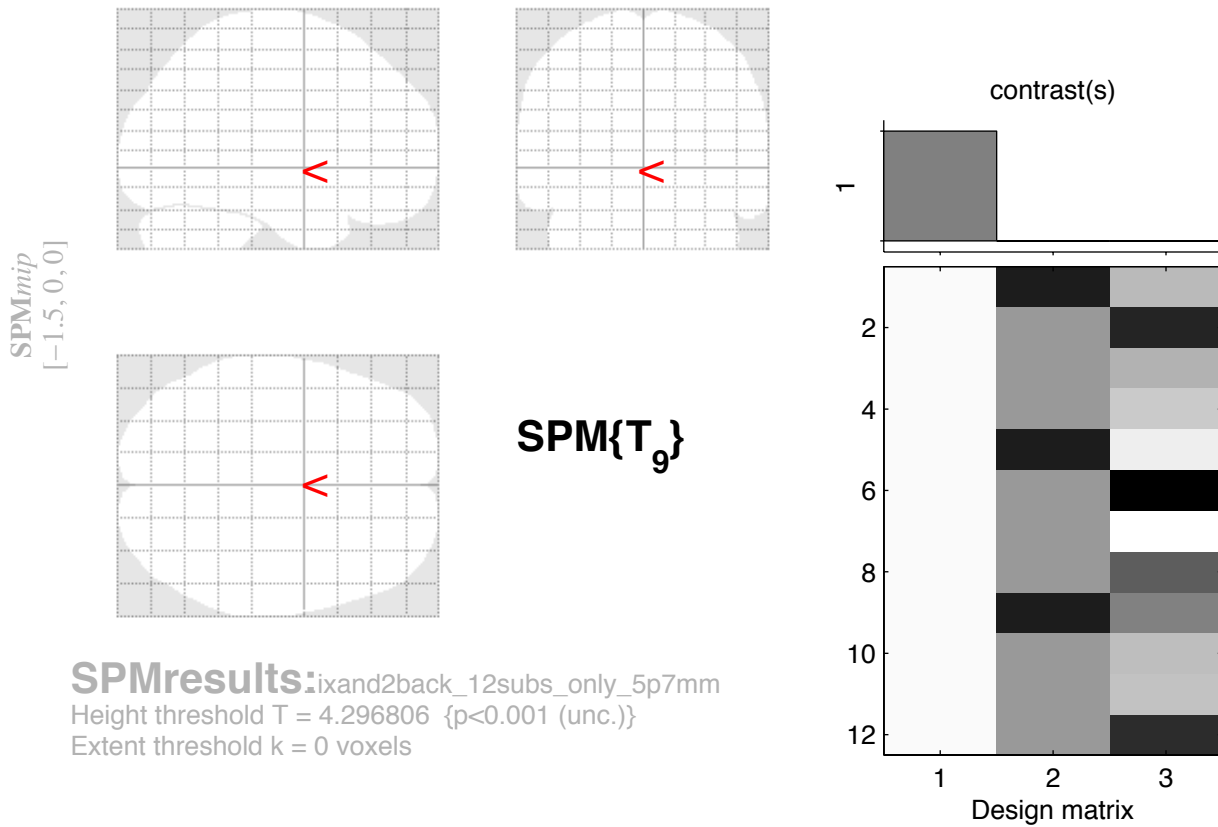

**SPMresults:**ixand2back\_12subs\_only\_5p7mm  
 Height threshold  $T = 4.296806$  { $p < 0.001$  (unc.)}  
 Extent threshold  $k = 0$  voxels

## Statistics: $p$ -values adjusted for search volume

| set-level |     | cluster-level  |                |       | peak-level   |                |                |     |                | mm           | mm | mm |  |
|-----------|-----|----------------|----------------|-------|--------------|----------------|----------------|-----|----------------|--------------|----|----|--|
| $p$       | $c$ | $p_{FWE-corr}$ | $q_{FDR-corr}$ | $k_E$ | $p_{uncorr}$ | $p_{FWE-corr}$ | $q_{FDR-corr}$ | $T$ | $(Z_{\alpha})$ | $p_{uncorr}$ |    |    |  |

*no suprathreshold clusters*

table shows 3 local maxima more than 8.0mm apart

|                                                          |                                                          |
|----------------------------------------------------------|----------------------------------------------------------|
| Height threshold: $T = 4.30$ , $p = 0.001$ (1.000)       | Degrees of freedom = [1.0, 9.0]                          |
| Extent threshold: $k = 0$ voxels                         | FWHM = 9.3 11.0 10.2 mm mm mm; 3.1 3.7 3.4 {voxels}      |
| Expected voxels per cluster, $\langle k \rangle = 1.863$ | Volume: 1294110 = 47930 voxels = 1111.9 resels           |
| Expected number of clusters, $\langle c \rangle = 26.75$ | Voxel size: 3.0 3.0 3.0 mm mm mm; (resel = 38.73 voxels) |
| FWEp: 10.666, FDRp: Inf, FWEc: Inf, FDRc: Inf            |                                                          |

# SYN decreases, fixand2back, 12 subs only, 5p7m

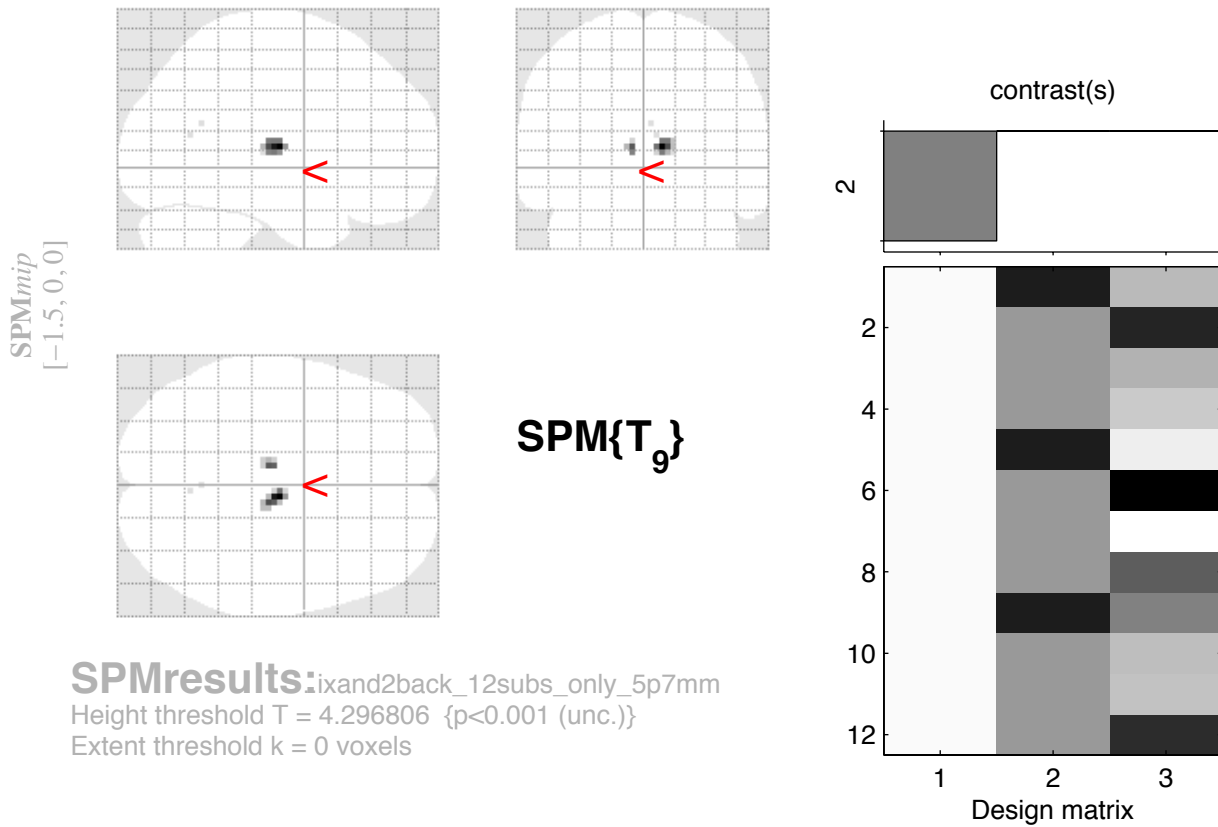

## Statistics: $p$ -values adjusted for search volume

| set-level |     | cluster-level         |                       |       | peak-level          |                       |                       |      |                  | mm mm mm            |    |     |    |
|-----------|-----|-----------------------|-----------------------|-------|---------------------|-----------------------|-----------------------|------|------------------|---------------------|----|-----|----|
| $p$       | $c$ | $p_{\text{FWE-corr}}$ | $q_{\text{FDR-corr}}$ | $k_E$ | $p_{\text{uncorr}}$ | $p_{\text{FWE-corr}}$ | $q_{\text{FDR-corr}}$ | $T$  | $(Z_{\text{e}})$ | $p_{\text{uncorr}}$ |    |     |    |
| 1.000     | 4   | 0.029                 | 0.004                 | 25    | 0.001               | 1.000                 | 0.993                 | 5.81 | 3.66             | 0.000               | 8  | -15 | 9  |
|           |     | 0.482                 | 0.049                 | 10    | 0.025               | 1.000                 | 0.993                 | 5.17 | 3.44             | 0.000               | -8 | -21 | 9  |
|           |     | 1.000                 | 0.450                 | 1     | 0.450               | 1.000                 | 0.993                 | 4.31 | 3.09             | 0.001               | 4  | -63 | 15 |
|           |     | 1.000                 | 0.450                 | 1     | 0.450               | 1.000                 | 0.993                 | 4.31 | 3.09             | 0.001               | 2  | -57 | 21 |

table shows 3 local maxima more than 8.0mm apart

Height threshold:  $T = 4.30$ ,  $p = 0.001$  (1.000)      Degrees of freedom = [1.0, 9.0]  
 Extent threshold:  $k = 0$  voxels      FWHM = 9.3 11.0 10.2 mm mm mm; 3.1 3.7 3.4 {voxels}  
 Expected voxels per cluster,  $\langle k \rangle = 1.863$       Volume: 1294110 = 47930 voxels = 1111.9 resels  
 Expected number of clusters,  $\langle c \rangle = 26.75$       Voxel size: 3.0 3.0 3.0 mm mm mm; (resel = 38.73 voxels)  
 FWEp: 10.666, FDRp: Inf, FWEc: 25, FDRc: 10
