# Supplementary material for: Arterial spin labeling versus BOLD in direct challenge and drug-task interaction pharmacological fMRI
Source: PeerJ journal article supplement (doi:10.7717/peerj.687), 2014-12-11
Supplement: SupplementalFigure6.pdf [file SupplementalFigure6.pdf]

# BOLD SYN increases, 60 mg

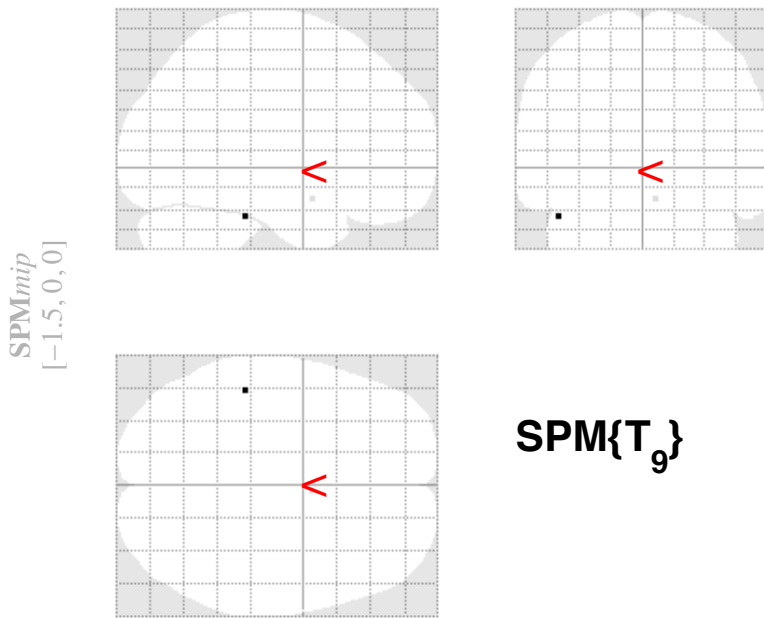

**SPMresults:** bold\_SYN\_effect\_60\_only  
 Height threshold T = 4.296806 {p<0.001 (unc.)}  
 Extent threshold k = 0 voxels

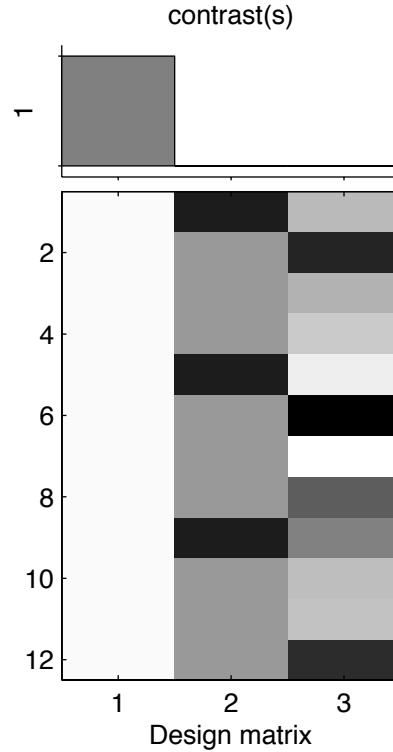

## Statistics: p-values adjusted for search volume

| set-level |     | cluster-level  |                |       | peak-level   |                |                |      |                | mm mm mm     |     |     |     |
|-----------|-----|----------------|----------------|-------|--------------|----------------|----------------|------|----------------|--------------|-----|-----|-----|
| $p$       | $c$ | $p_{FWE-corr}$ | $q_{FDR-corr}$ | $k_E$ | $p_{uncorr}$ | $p_{FWE-corr}$ | $q_{FDR-corr}$ | $T$  | $(Z_{\equiv})$ | $p_{uncorr}$ |     |     |     |
| 1.000     | 2   | 1.000          | 0.397          | 1     | 0.397        | 1.000          | 0.595          | 5.10 | 3.41           | 0.000        | -46 | -33 | -27 |
|           |     | 1.000          | 0.397          | 1     | 0.397        | 1.000          | 0.595          | 4.96 | 3.36           | 0.000        | 4   | 3   | -18 |

table shows 3 local maxima more than 8.0mm apart

Height threshold: T = 4.30, p = 0.001 (1.000)      Degrees of freedom = [1.0, 9.0]  
 Extent threshold: k = 0 voxels      FWHM = 10.0 10.2 8.2 mm mm mm; 3.3 3.4 2.7 {voxels}  
 Expected voxels per cluster, <k> = 1.498      Volume: 1692981 = 62703 voxels = 1822.3 resels  
 Expected number of clusters, <c> = 42.98      Voxel size: 3.0 3.0 3.0 mm mm mm; (resel = 31.15 voxels)  
 FWEp: 11.012, FDRp: Inf, FWEc: Inf, FDRc: Inf

# BOLD SYN decreases 60 mg only

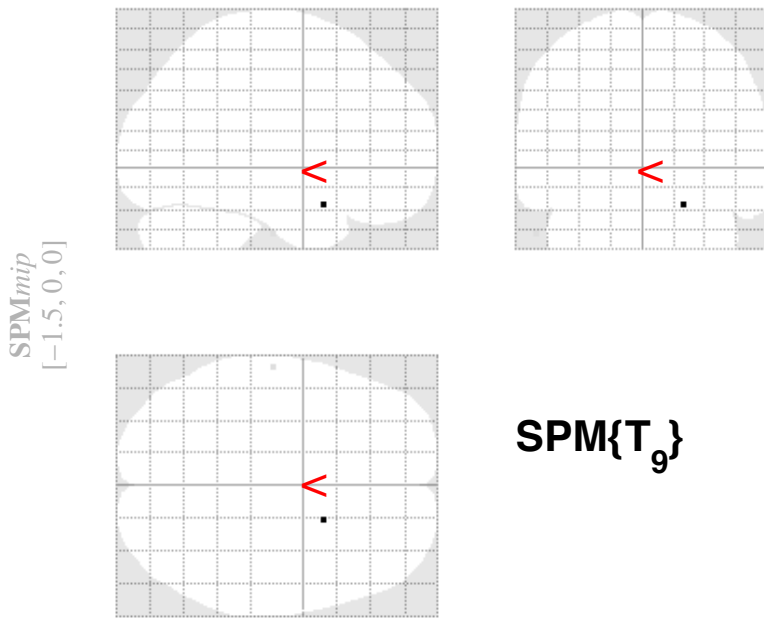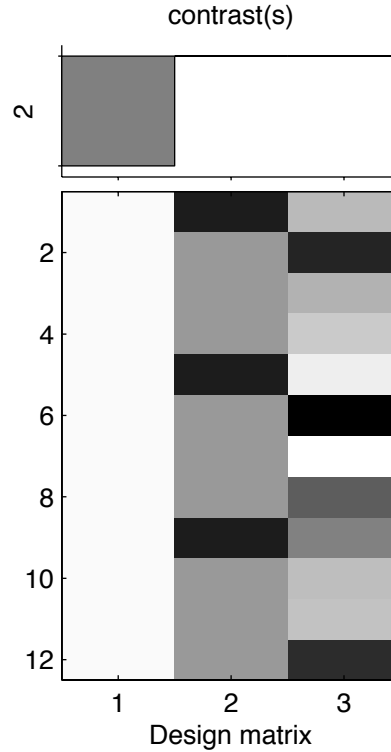

**SPMresults:** bold\_SYN\_effect\_60\_only  
 Height threshold  $T = 4.296806$  { $p < 0.001$  (unc.)}  
 Extent threshold  $k = 0$  voxels

## Statistics: $p$ -values adjusted for search volume

| set-level |     | cluster-level         |                       |       | peak-level          |                       |                       |      |                    | mm mm mm            |     |     |     |
|-----------|-----|-----------------------|-----------------------|-------|---------------------|-----------------------|-----------------------|------|--------------------|---------------------|-----|-----|-----|
| $p$       | $c$ | $p_{\text{FWE-corr}}$ | $q_{\text{FDR-corr}}$ | $k_E$ | $p_{\text{uncorr}}$ | $p_{\text{FWE-corr}}$ | $q_{\text{FDR-corr}}$ | $T$  | $(Z_{\text{max}})$ | $p_{\text{uncorr}}$ |     |     |     |
| 1.000     | 2   | 1.000                 | 0.397                 | 1     | 0.397               | 1.000                 | 0.549                 | 5.97 | 3.71               | 0.000               | 20  | 9   | -21 |
|           |     | 1.000                 | 0.397                 | 1     | 0.397               | 1.000                 | 0.820                 | 4.55 | 3.20               | 0.001               | -58 | -18 | -36 |

table shows 3 local maxima more than 8.0mm apart

Height threshold:  $T = 4.30$ ,  $p = 0.001$  (1.000)      Degrees of freedom = [1.0, 9.0]  
 Extent threshold:  $k = 0$  voxels      FWHM = 10.0 10.2 8.2 mm mm mm; 3.3 3.4 2.7 {voxels}  
 Expected voxels per cluster,  $\langle k \rangle = 1.498$       Volume: 1692981 = 62703 voxels = 1822.3 resels  
 Expected number of clusters,  $\langle c \rangle = 42.98$       Voxel size: 3.0 3.0 3.0 mm mm mm; (resel = 31.15 voxels)  
 FWEp: 11.012, FDRp: Inf, FWEc: Inf, FDRc: Inf
