# Supplementary material for: Arterial spin labeling versus BOLD in direct challenge and drug-task interaction pharmacological fMRI
Source: PeerJ journal article supplement (doi:10.7717/peerj.687), 2014-12-11
Supplement: SupplementalFigure8.pdf [file SupplementalFigure8.pdf]

# BOLD LD increases (pbo and drug days), 12 subs

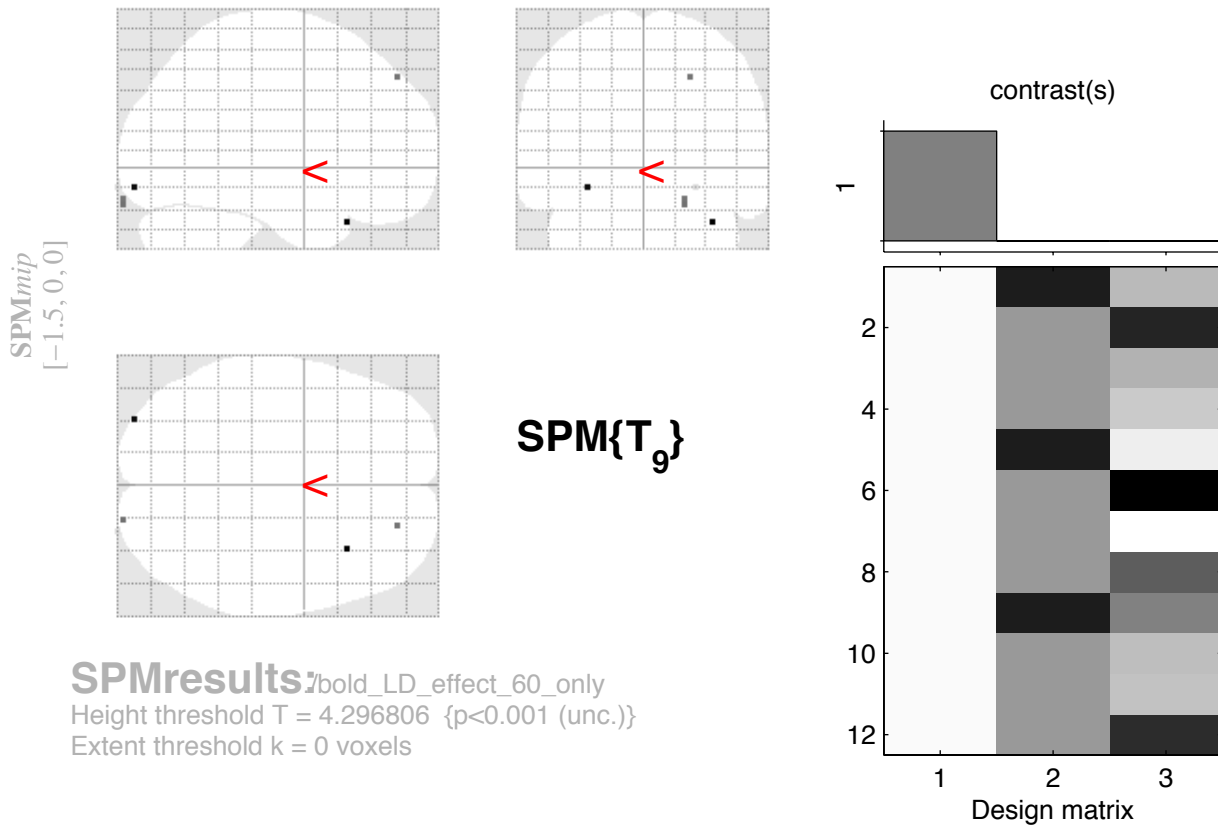

**SPMresults:** bold\_LD\_effect\_60\_only  
 Height threshold T = 4.296806 {p<0.001 (unc.)}  
 Extent threshold k = 0 voxels

## Statistics: p-values adjusted for search volume

| set-level |     | cluster-level  |                |       | peak-level   |                |                |      |                    | mm mm mm     |     |      |     |
|-----------|-----|----------------|----------------|-------|--------------|----------------|----------------|------|--------------------|--------------|-----|------|-----|
| $p$       | $c$ | $p_{FWE-corr}$ | $q_{FDR-corr}$ | $k_E$ | $p_{uncorr}$ | $p_{FWE-corr}$ | $q_{FDR-corr}$ | $T$  | $(Z_{\text{max}})$ | $p_{uncorr}$ |     |      |     |
| 1.000     | 5   | 1.000          | 0.400          | 1     | 0.400        | 1.000          | 0.883          | 5.21 | 3.45               | 0.000        | 34  | 21   | -30 |
|           |     | 1.000          | 0.400          | 1     | 0.400        | 1.000          | 0.883          | 5.14 | 3.43               | 0.000        | -32 | -93  | -12 |
|           |     | 1.000          | 0.400          | 2     | 0.233        | 1.000          | 0.883          | 4.74 | 3.27               | 0.001        | 20  | -99  | -21 |
|           |     | 1.000          | 0.400          | 1     | 0.400        | 1.000          | 0.883          | 4.74 | 3.27               | 0.001        | 22  | 48   | 45  |
|           |     | 1.000          | 0.400          | 1     | 0.400        | 1.000          | 0.987          | 4.31 | 3.10               | 0.001        | 26  | -102 | -12 |

table shows 3 local maxima more than 8.0mm apart

Height threshold: T = 4.30, p = 0.001 (1.000)      Degrees of freedom = [1.0, 9.0]  
 Extent threshold: k = 0 voxels      FWHM = 10.0 10.2 8.3 mm mm mm; 3.3 3.4 2.8 {voxels}  
 Expected voxels per cluster, <k> = 1.514      Volume: 1692981 = 62703 voxels = 1804.1 resels  
 Expected number of clusters, <c> = 42.57      Voxel size: 3.0 3.0 3.0 mm mm mm; (resel = 31.47 voxels)  
 FWEp: 11.012, FDRp: Inf, FWEc: Inf, FDRc: Inf

# BOLD LD decreases (pbo and drug days), 12 subs

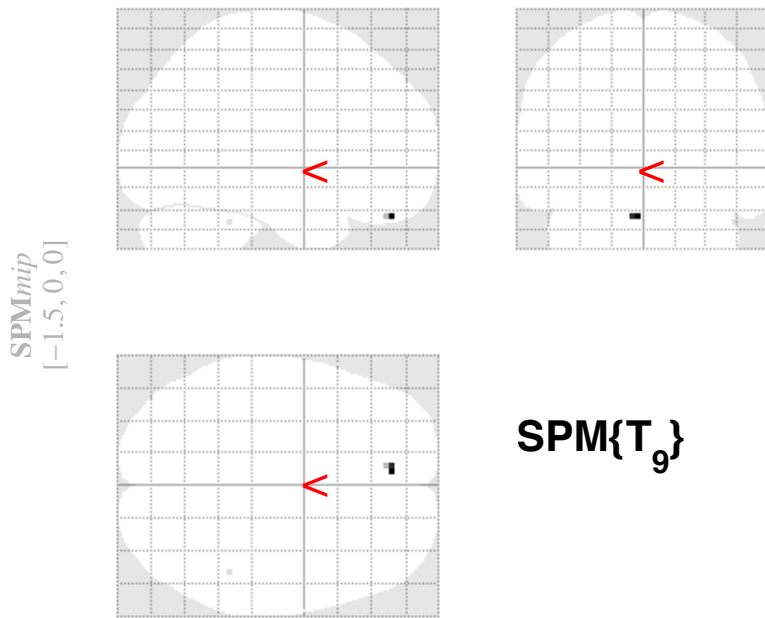

**SPMresults:** bold\_LD\_effect\_60\_only  
 Height threshold  $T = 4.296806$  { $p < 0.001$  (unc.)}  
 Extent threshold  $k = 0$  voxels

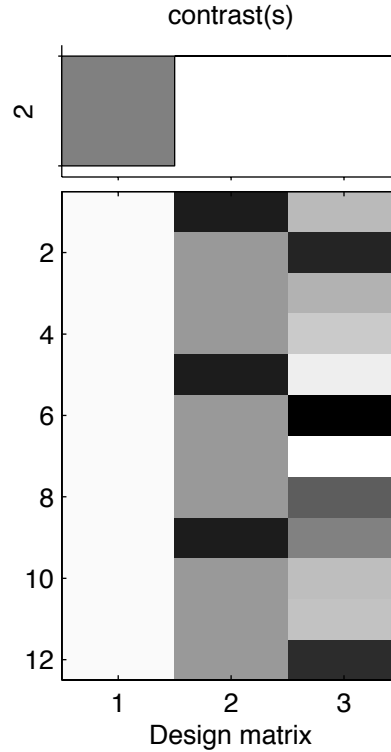

## Statistics: $p$ -values adjusted for search volume

| set-level |     | cluster-level         |                       |       | peak-level          |                       |                       |      |                  | mm mm mm            |    |     |     |
|-----------|-----|-----------------------|-----------------------|-------|---------------------|-----------------------|-----------------------|------|------------------|---------------------|----|-----|-----|
| $p$       | $c$ | $p_{\text{FWE-corr}}$ | $q_{\text{FDR-corr}}$ | $k_E$ | $p_{\text{uncorr}}$ | $p_{\text{FWE-corr}}$ | $q_{\text{FDR-corr}}$ | $T$  | $(Z_{\text{e}})$ | $p_{\text{uncorr}}$ |    |     |     |
| 1.000     | 2   | 0.998                 | 0.297                 | 3     | 0.148               | 0.999                 | 0.331                 | 6.67 | 3.91             | 0.000               | -4 | 45  | -27 |
|           |     | 1.000                 | 0.400                 | 1     | 0.400               | 1.000                 | 0.946                 | 4.37 | 3.12             | 0.001               | 46 | -42 | -30 |

table shows 3 local maxima more than 8.0mm apart

Height threshold:  $T = 4.30$ ,  $p = 0.001$  (1.000)

Extent threshold:  $k = 0$  voxels

Expected voxels per cluster,  $\langle k \rangle = 1.514$

Expected number of clusters,  $\langle c \rangle = 42.57$

FWEp: 11.012, FDRp: Inf, FWEc: Inf, FDRc: Inf

Degrees of freedom = [1.0, 9.0]

FWHM = 10.0 10.2 8.3 mm mm mm; 3.3 3.4 2.8 {voxels}

Volume: 1692981 = 62703 voxels = 1804.1 resels

Voxel size: 3.0 3.0 3.0 mm mm mm; (resel = 31.47 voxels)
